# Supplementary material for: Changing characteristics of runoff and freshwater export from watersheds draining northern Alaska
Source: Copernicus journal article supplement (doi:10.5194/tc-13-3337-2019), 2019-12-18
Supplement: Supplementary file 1 [file tc-13-3337-2019-supplement.pdf]

Supplement of The Cryosphere, 13, 3337–3352, 2019  
<https://doi.org/10.5194/tc-13-3337-2019-supplement>  
© Author(s) 2019. This work is distributed under  
the Creative Commons Attribution 4.0 License.

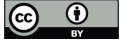

*Supplement of*

## **Changing characteristics of runoff and freshwater export from watersheds draining northern Alaska**

**Michael A. Rawlins et al.**

*Correspondence to:* Michael A. Rawlins ([rawlins@geo.umass.edu](mailto:rawlins@geo.umass.edu))

The copyright of individual parts of the supplement might differ from the CC BY 4.0 License.

## References

- Brodzick, M. J. and Knowles, K.: EASE-Grid: A Versatile Set of Equal-Area Projections and Grids, in M. Goodchild (Ed.) *Discrete Global Grids*. Santa Barbara, CA, USA: National Center for Geographic Information and Analysis., 2002. 11
- Food and Agriculture Organization/UNESCO: *Digital Soil Map of the World and Derived Properties*, version 3.5, November, 1995. Original scale 1:5,000,000, UNESCO, Paris, France, 1995. 2
- Hugelius, G., Strauss, J., Zubrzycki, S., Harden, J. W., Schuur, E., Ping, C.-L., Schirmer, L., Grosse, G., Michaelson, G. J., Koven, C. D., and O'Donnell, J.: Estimated stocks of circumpolar permafrost carbon with quantified uncertainty ranges and identified data gaps, *Biogeosciences*, 11, 6573–6593, <https://doi.org/10.5194/bg-11-6573-2014>, 2014. 2
- Nicolsky, D. J., Romanovsky, V., Panda, S., Marchenko, S., and Muskett, R.: Applicability of the ecosystem type approach to model permafrost dynamics across the Alaska North Slope, *J. Geophys. Res.-Earth*, 122, 50–75, <https://doi.org/10.1002/2016JF003852>, 2017. 3
- Stuefer, S., Kane, D. L., and Liston, G. E.: In situ snow water equivalent observations in the US Arctic, *Hydrol. Res.*, 44, 21–34, <https://doi.org/10.2166/nh.2012.177>, 2013. 5

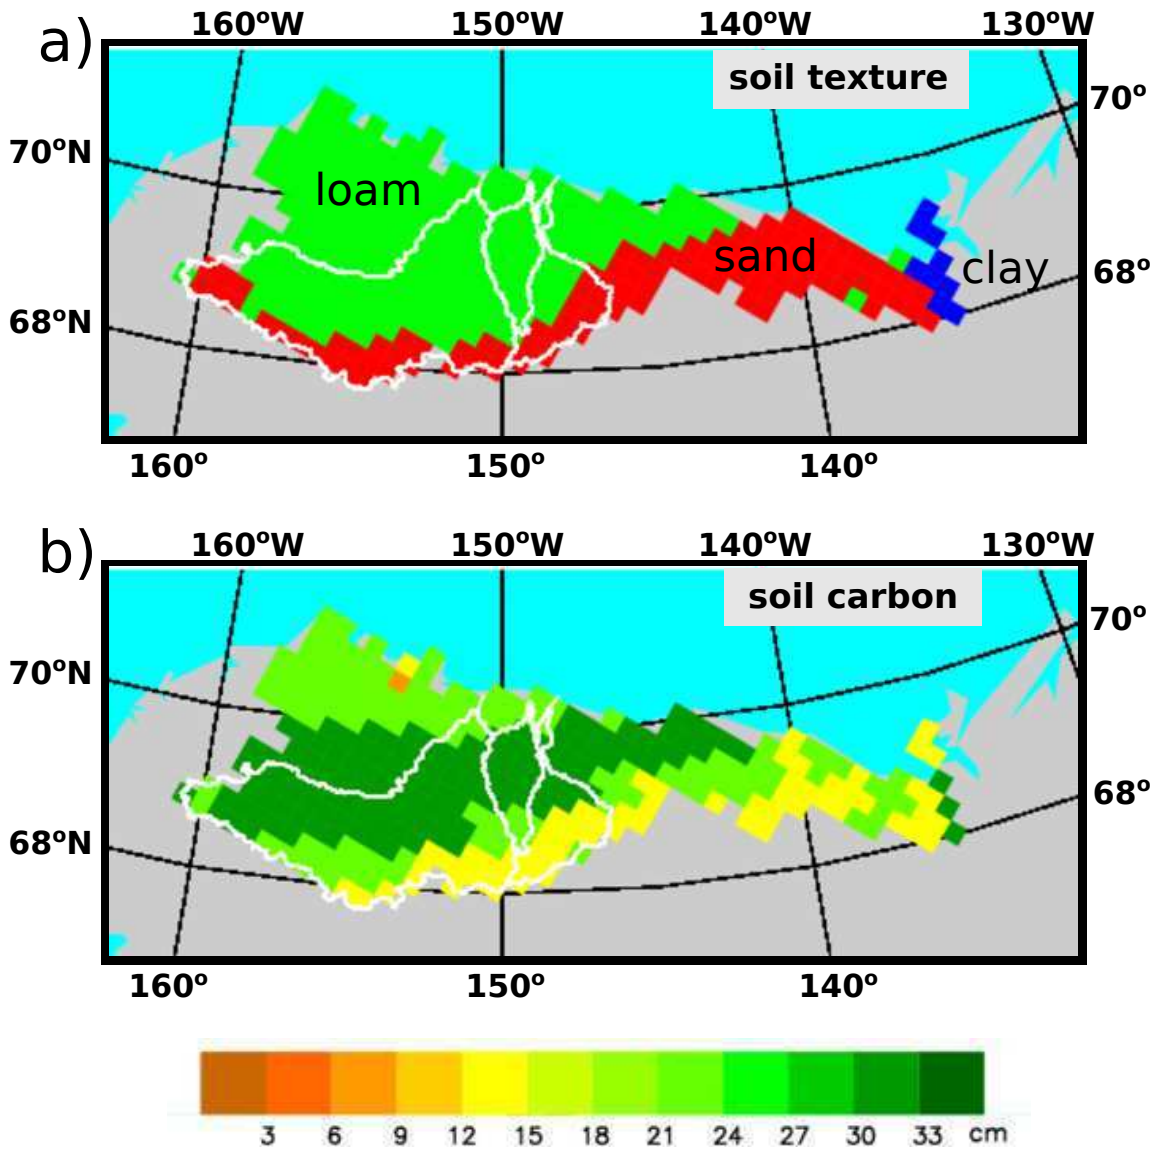

Figure S1: a) Soil texture classes and b) thickness of surface soil carbon layer used in model parameterizations. Soil textures are drawn from the UNESCO Food and Agriculture Organization’s Digital Soil Map of the World (Food and Agriculture Organization/UNESCO). Soil carbon is taken from the Northern Circumpolar Soil Carbon Database (NCSCD) (Hugelius et al., 2014). Soil carbon thickness derived from the NCSCD data and used in the PWBM includes all soil layers for which some amount of carbon is present. Primarily mineral soil exists downward over the remainder of the soil column.

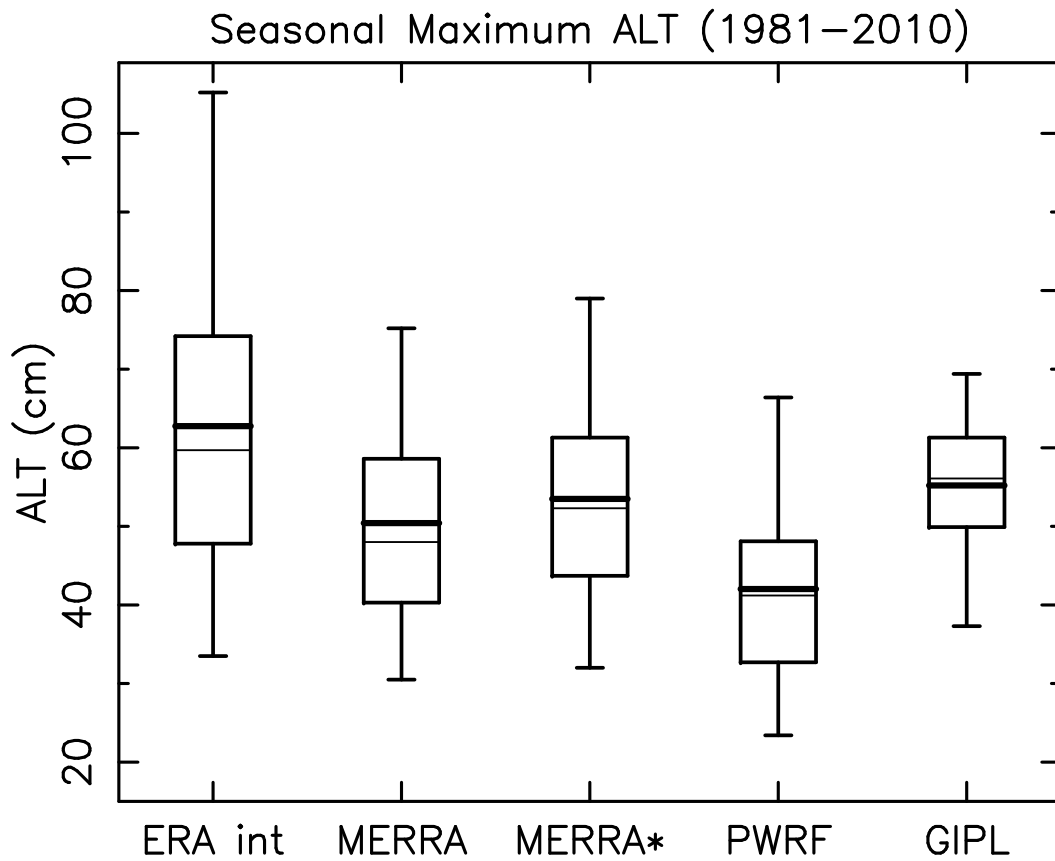

Figure S2: a) Seasonal maximum ALT (cm) as an average over the period 1981–2010 from PWBM simulations and the GIPL model. Boxplots represent the 217 (of 312) PWBM domain grid cells for which GIPL ALT data are available. Boxplots were drawn from PWBM simulation using climate forcings from ERA interim, MERRA, MERRA with precipitation adjustment (MERRA\*), and Polar WRF. Heavy line in each box is the distribution mean. Thin line is the distribution median. Boxes bracket the 25<sup>th</sup> and 75<sup>th</sup> percentiles. Whiskers show the 5<sup>th</sup> and 95<sup>th</sup> percentiles. From PWBM soil temperatures the seasonal maximum ALT is calculated as the depth to which the 0 °C penetrates each summer. Nicolsky et al. (2017) provide details on the GIPL ALT.

# Seasonal Maximum ALT

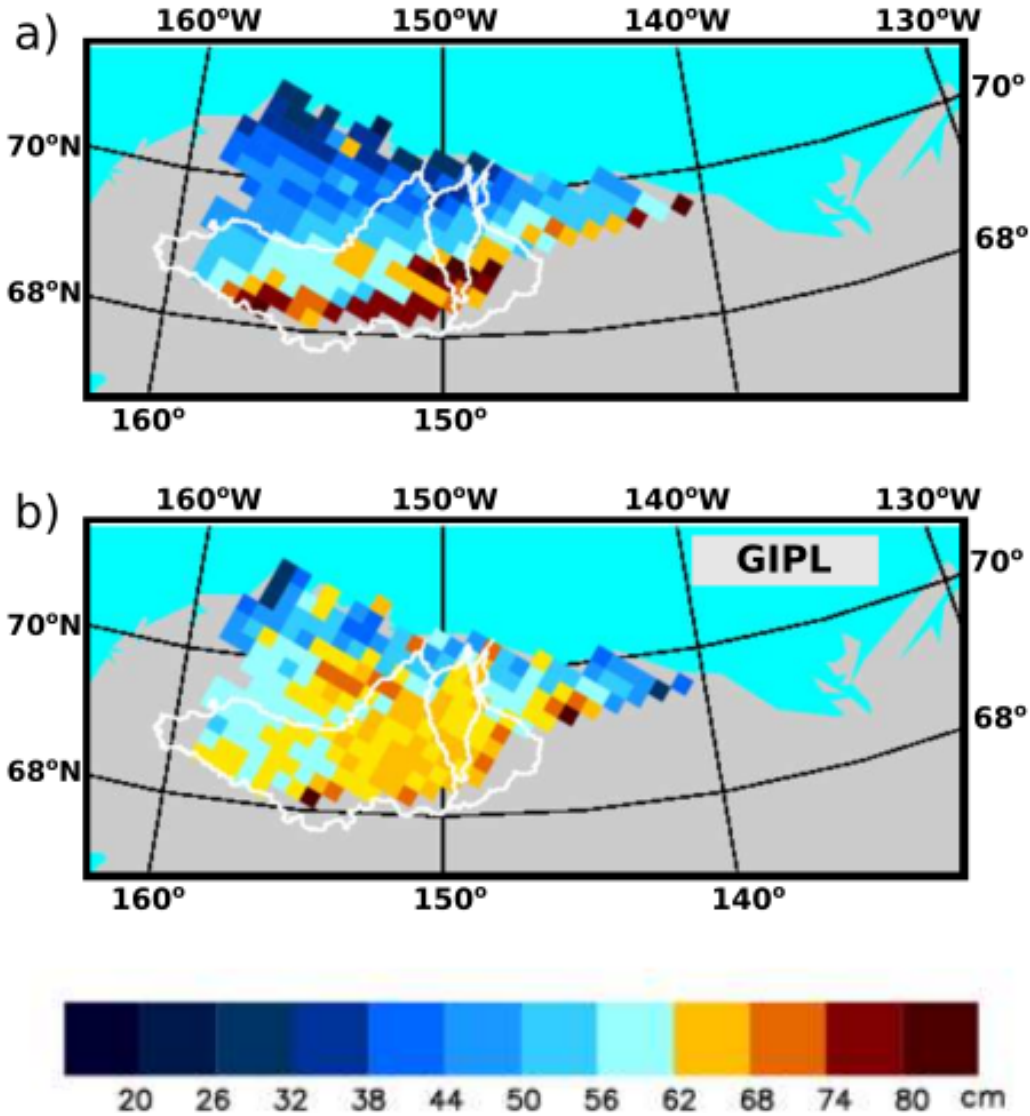

Figure S3: a) Seasonal maximum ALT (cm) as an average over the period 1981-2010 from a) PWBM with MERRA\* forcing and b) GIPL.

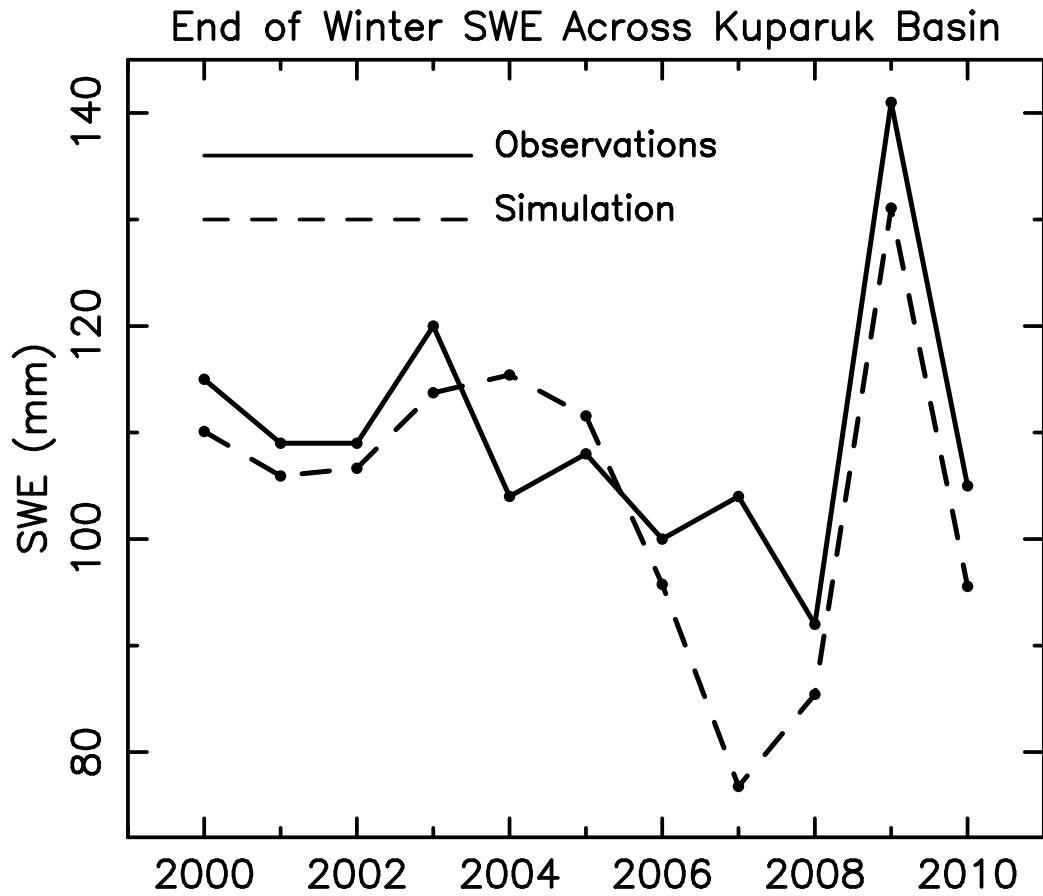

Figure S4: Observed and model simulated end of winter snow water equivalent (SWE, mm) averaged over the Kuparuk River basin 2000–2010. Observed values represent the average of measurements as described by Stuefer et al. (2013). Simulated end of season SWE is calculated as the average between 24 April and 7 May each year.

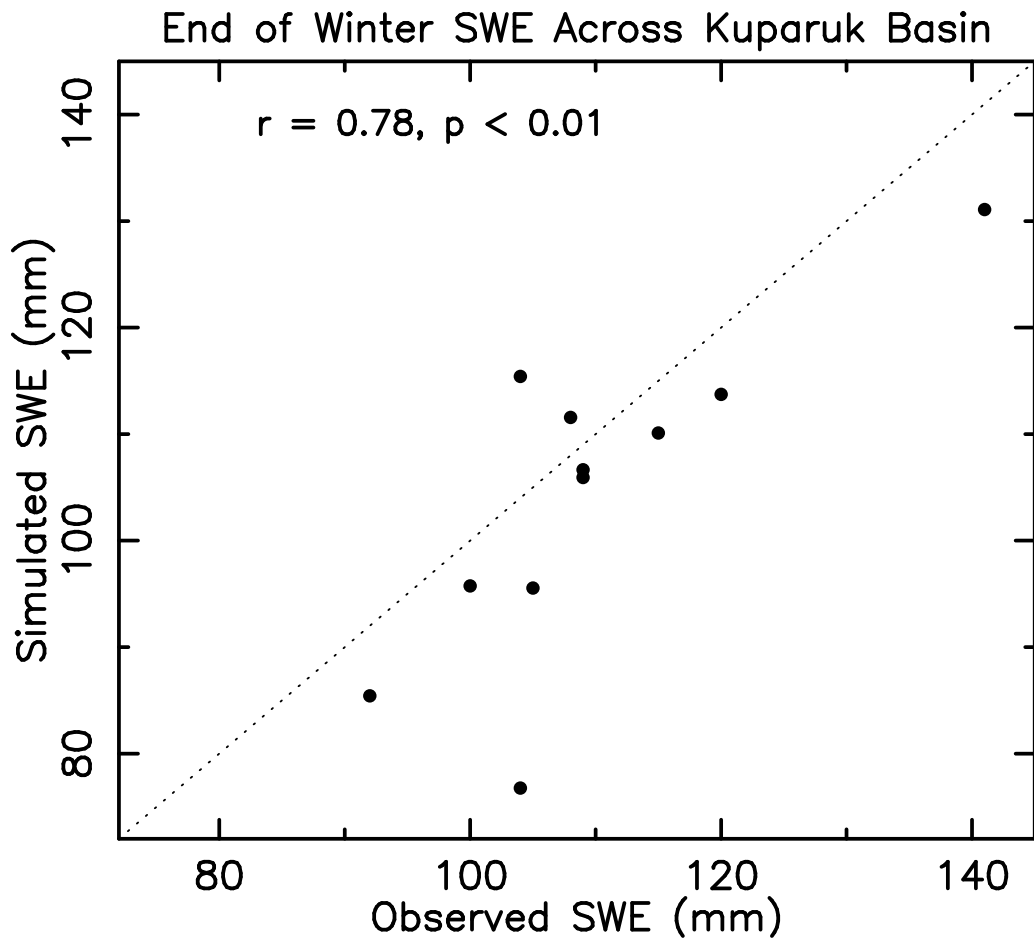

Figure S5: Observed and model simulated end of winter SWE (mm) for the Kuparuk Basin 2000–2010.

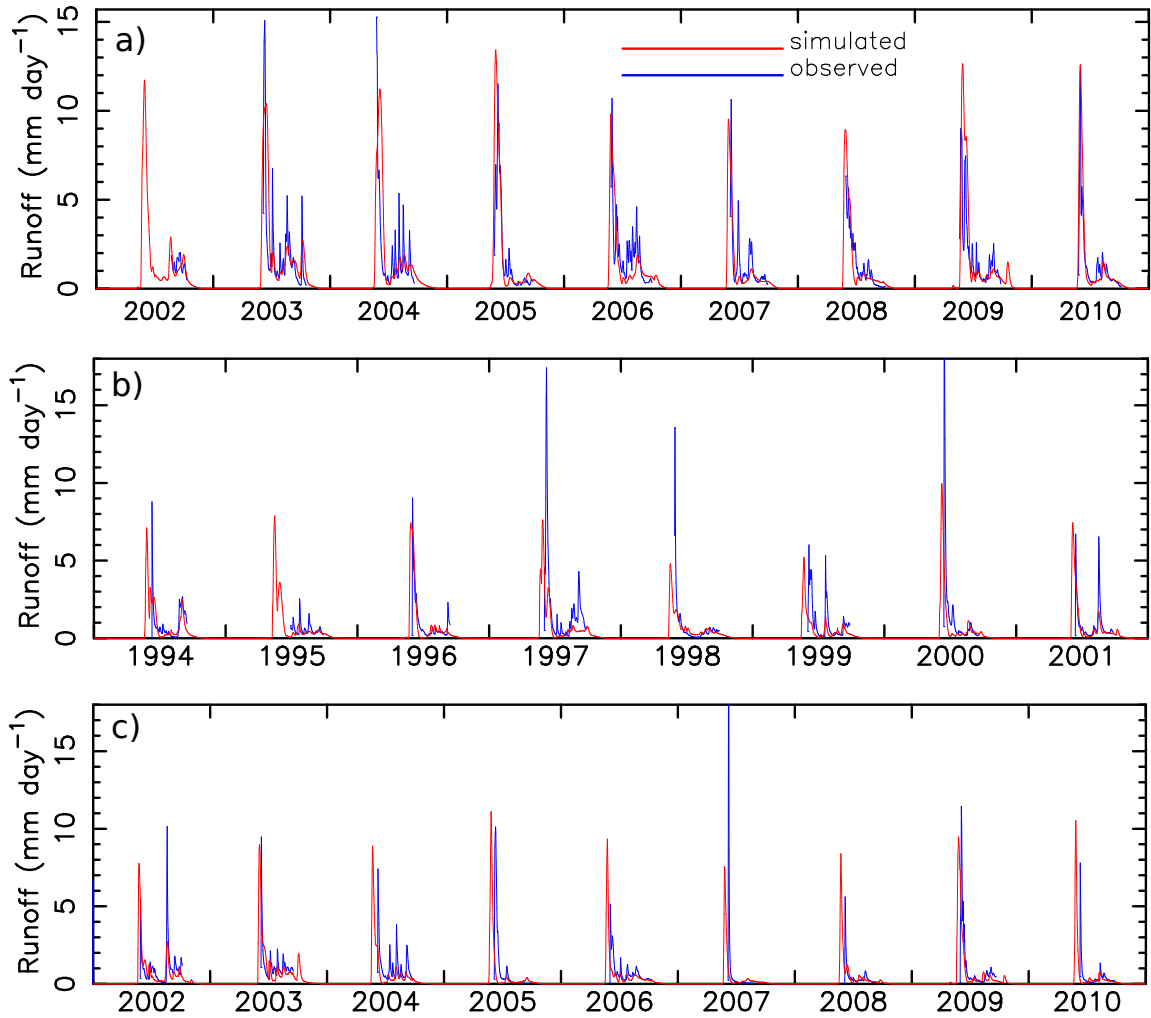

Figure S6: Simulated vs observed daily  $R$  ( $\text{mm yr}^{-1}$ ) for the (a) Colville River at Umiat, AK and (b and c) Kuparuk River at Deadhorse. Simulated  $R$  is calculated from the routed river discharge ( $Q$ ) at the model grid cell where Umiat and Deadhorse are located, respectively.



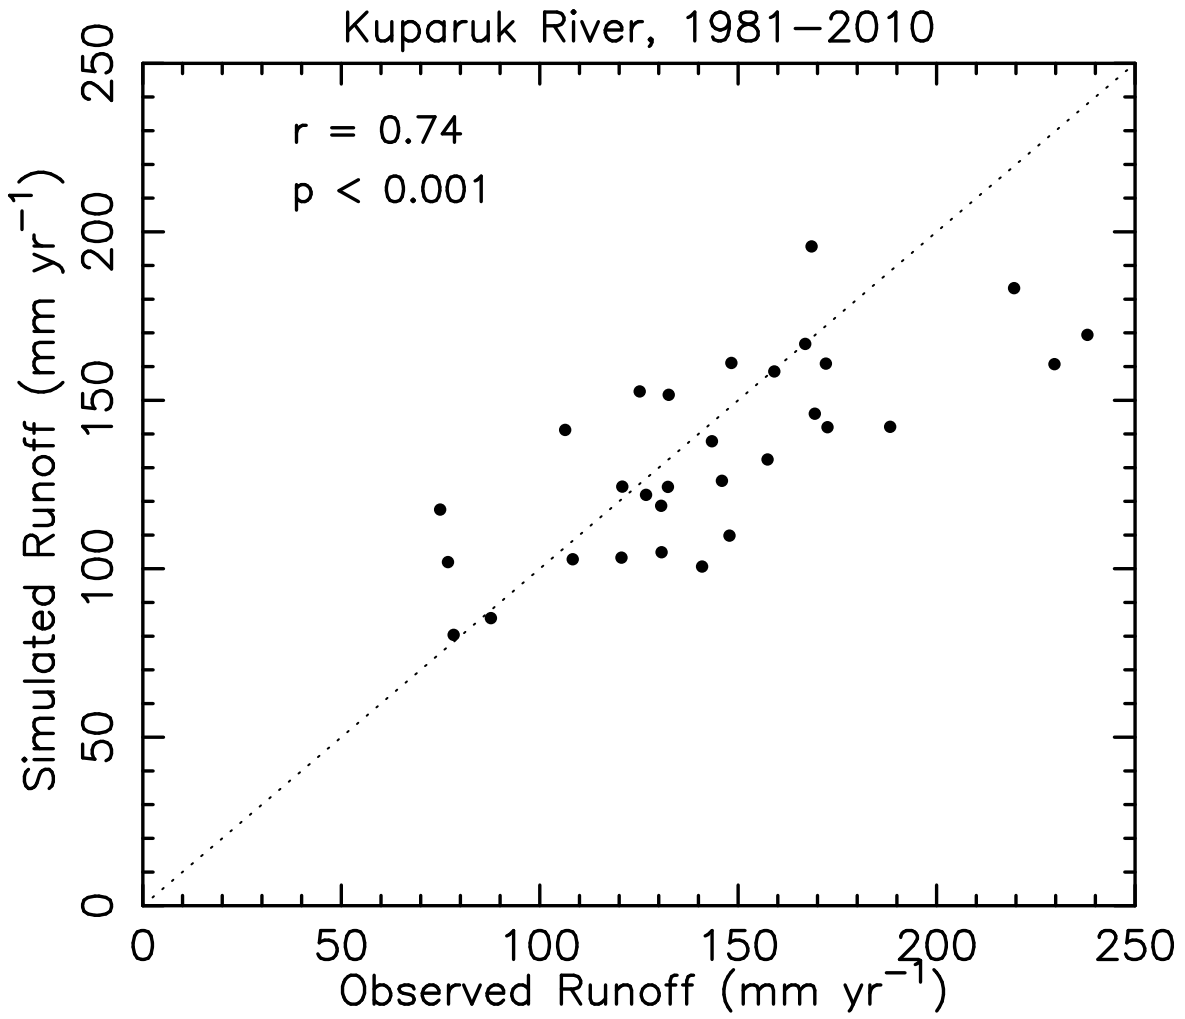

Figure S7: Simulated vs observed annual total R ( $\text{mm yr}^{-1}$ ) for the Kuparuk basin. Correlation coefficient (LLS) is  $r = 0.73$  ( $p < 0.001$ ).

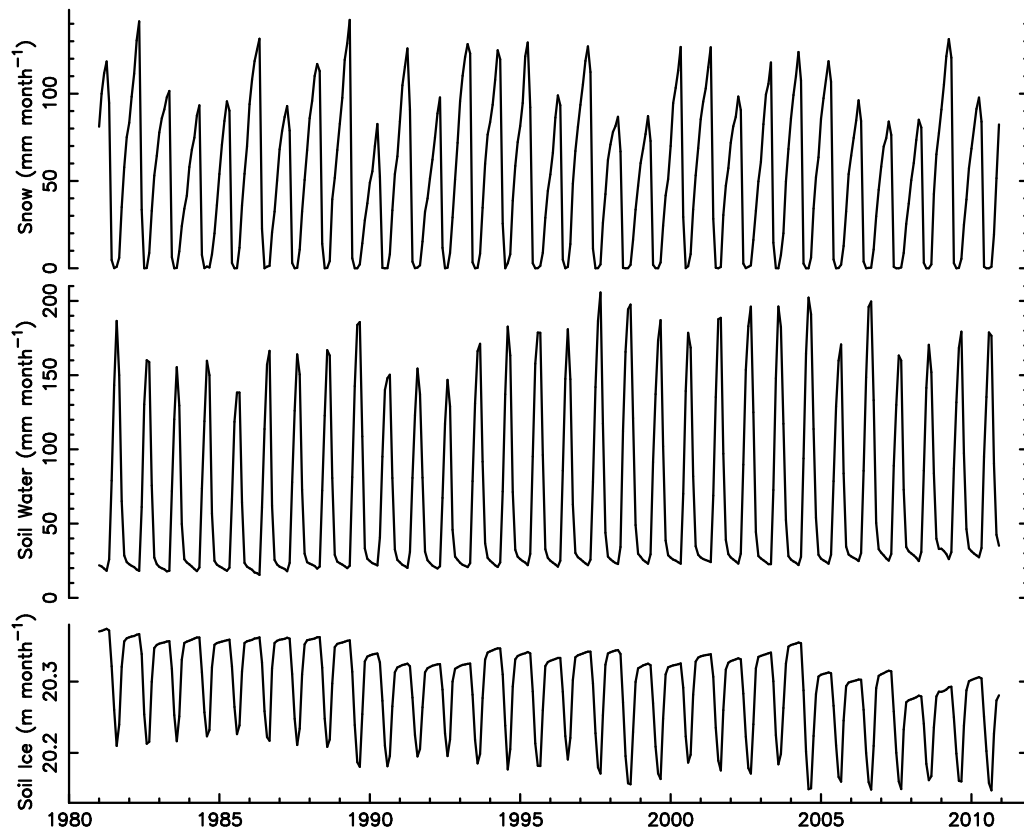

Figure S8: Monthly water storage for snow (solid and liquid portions, mm month<sup>-1</sup>), soil water (mm month<sup>-1</sup>), and soil ice (m month<sup>-1</sup>) as an average across the North Slope drainage basin. Amounts are totaled over the full 60 m model soil column.

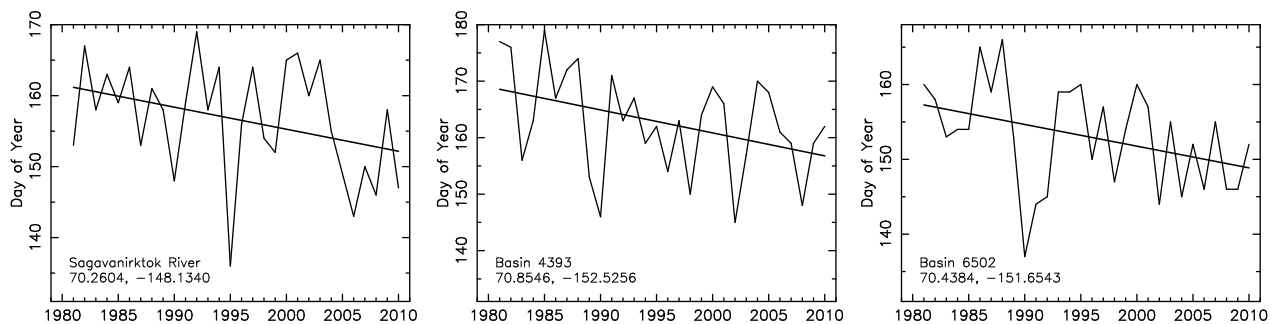

Figure S9: Date of maximum daily Q over period 1981–2010 for the three North Slope rivers with a significant ( $p < 0.05$ ) trend to earlier maximum daily Q. The Sagavanirktok is the largest of the three. Linear least squares fit, basin name, and latitude and longitude coordinates shown.

Table S1: River basins ordered by size for the North Slope drainage region. Basins in the simulated topological network (STN) were defined on the  $25 \times 25$  km<sup>2</sup> EASE-Grid (Brodzik and Knowles, 2002). Areas in km<sup>2</sup> based on extent in the STN of the full drainage basin expressed to the respective river mouth at the coast. Names listed for rivers with areas greater than 4000 km<sup>2</sup>. Unnamed rivers are numbered by size among all river basins in the pan-Arctic STN.

| Latitude | Longitude | Basin area | Name          |
|----------|-----------|------------|---------------|
| 70.3288  | -151.0736 | 64095      | Colville      |
| 70.6501  | -154.3348 | 18851      | Ikpikpuk      |
| 70.2604  | -148.1340 | 16338      | Sagavanirktok |
| 70.9372  | -156.1757 | 12568      | Meade         |
| 70.3802  | -148.6959 | 10054      | Kuparuk       |
| 69.4239  | -139.4672 | 6284       | Firth         |
| 70.0799  | -146.1292 | 5655       | Canning       |
| 69.8753  | -144.1624 | 5027       | Hulahula      |
| 70.0150  | -147.0306 | 4399       | Shaviovik     |
| 68.5119  | -135.8551 | 4399       | Unnamed       |
| 70.8438  | -155.5560 | 3770       | Basin 1659    |
| 69.5061  | -141.7360 | 3142       | Basin 1882    |
| 68.6613  | -137.1530 | 3142       | Basin 1896    |
| 69.9243  | -143.2594 | 2514       | Basin 1949    |
| 69.7866  | -142.7447 | 2514       | Basin 1966    |
| 69.1231  | -138.5215 | 2514       | Basin 2012    |
| 68.6711  | -136.2922 | 2514       | Basin 2041    |
| 69.6471  | -142.2369 | 2514       | Basin 2104    |
| 68.8289  | -136.7357 | 1885       | Basin 2279    |
| 68.9706  | -138.0587 | 1885       | Basin 2354    |
| 70.1386  | -147.5789 | 1885       | Basin 2463    |
| 69.5720  | -139.9503 | 1885       | Basin 2464    |
| 68.6760  | -135.4308 | 1885       | Basin 2466    |
| 71.2383  | -156.5290 | 1257       | Basin 3496    |
| 70.9549  | -154.6538 | 1257       | Basin 3497    |
| 70.3011  | -149.6013 | 1257       | Basin 3498    |
| 69.9515  | -145.5915 | 1257       | Basin 3500    |
| 69.8212  | -145.0607 | 1257       | Basin 3501    |
| 69.2742  | -138.9909 | 1257       | Basin 3503    |
| 69.3244  | -135.4441 | 1257       | Basin 3504    |
| 70.8546  | -152.5256 | 628        | Basin 4393    |
| 70.4159  | -150.1729 | 628        | Basin 4394    |
| 69.5415  | -140.8446 | 628        | Basin 4398    |
| 69.0003  | -135.4374 | 628        | Basin 4409    |
| 68.8388  | -135.0000 | 628        | Basin 4410    |
| 69.3244  | -134.5559 | 628        | Basin 4416    |
| 69.4845  | -134.1048 | 628        | Basin 4419    |
| 71.1461  | -155.8978 | 628        | Basin 6501    |
| 70.4384  | -151.6543 | 628        | Basin 6502    |
| 70.0604  | -143.7812 | 628        | Basin 6507    |
| 68.8167  | -137.6026 | 628        | Basin 6511    |
| 69.1605  | -135.8814 | 628        | Basin 6513    |
